# Supplementary material
Source: Springer Nature journal article supplement (https://www.springermedizin.de/resource/supplementary/12905_2009_191_MOESM3_ESM.pdf/9518140)
Supplement: MOESM3 [file 9518140]

*Motivations for pregnancy*

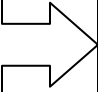

**C1. Regaining status through motherhood**

- 1. Pregnancy a proof of recovery
- 2. Regaining self control
- 3. Resuming childbearing

*Role of women in pregnancy*

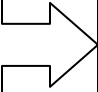

**C2. Women actively planning a pregnancy**

- 1. Tactful 'soliciting'
- 2. Condom intentionally undesirable
- 3. Pregnancy maintaining relationship

*Disclosing HIV status and sharing pregnancy intentions*

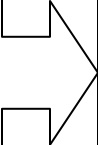

**C3. The voice within**

- 1. Stigma
- 2. Guilt
- 3. Risk of abandonment
- 4. Mistrust

*Role of clinic in pregnancy*

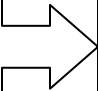

**C5. Clinic interfering in the women's decision to become pregnant**

- 1. Providing permission to become pregnant
- 2. Testing for possibility to become pregnant

**C6. Sex is private and unpredictable**

- 1. Sex is between woman and partner
- 2. Unpredictable nature of sex

**Activating motherhood**

**Between silence and openness**

**Predicting the unpredictable**

**S  
T  
R  
I  
V  
E  
  
F  
O  
R  
  
M  
O  
T  
H  
E  
R  
H  
O  
O  
D**
